# Supplementary material for: Synthesis of dimethyl carbonate (DMC) based biodegradable nitrogen mustard ionic carbonate (NMIC) nanoparticles
Source: Royal Society of Chemistry journal article supplement (doi:10.1039/c4ra13290d), 2015-01-01
Supplement: c4ra13290d1.pdf [file c4ra13290d1.pdf]

Supplementary Data

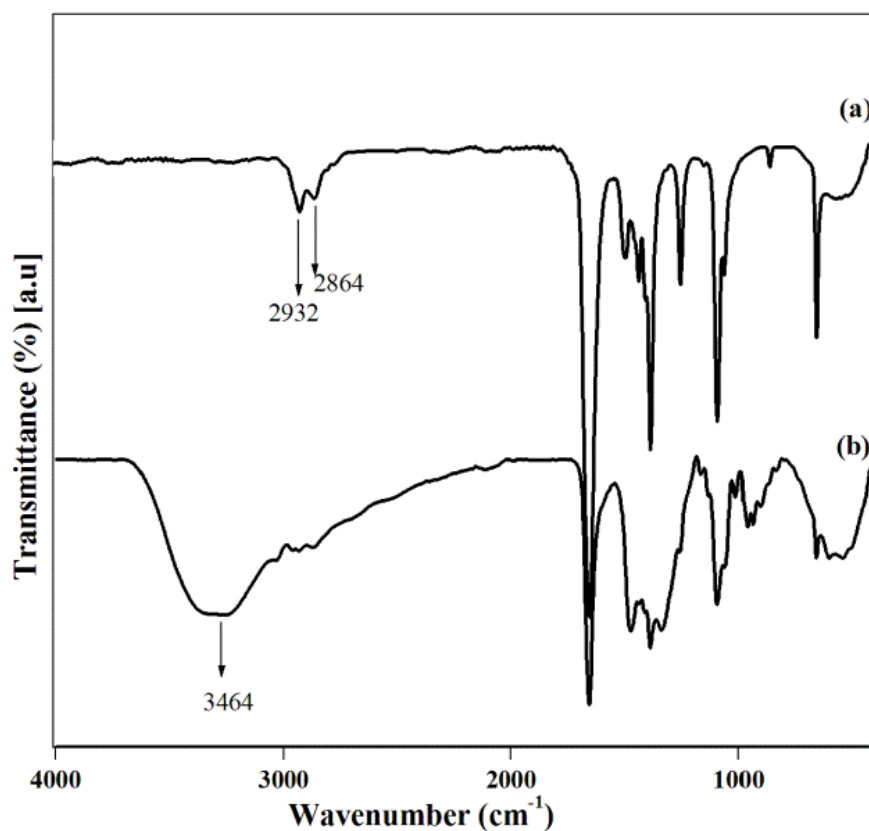

Fig. S1† FTIR of (a) DAEC (b) NMIC

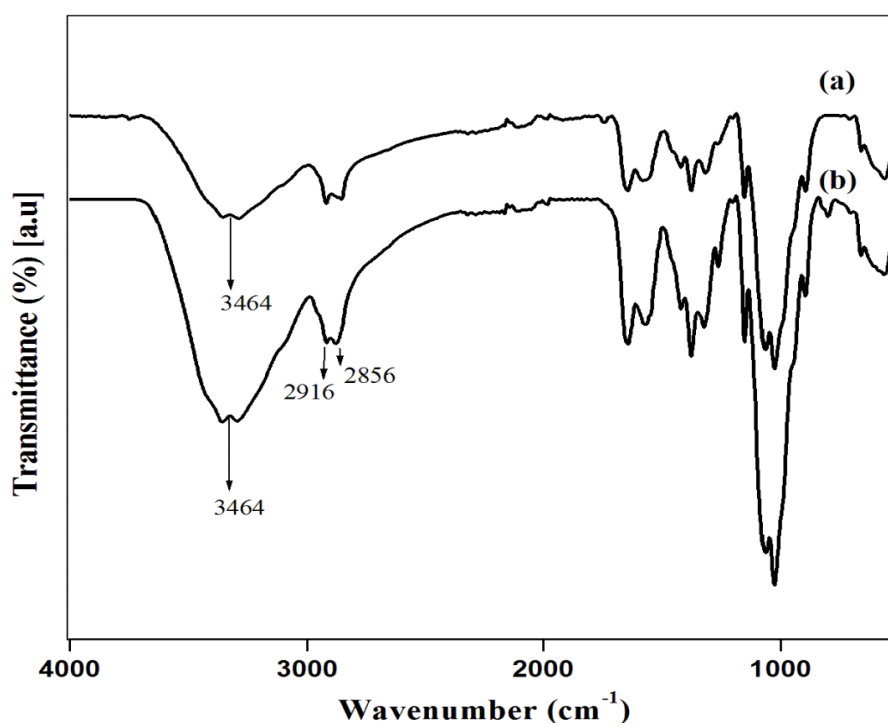

Fig. S2† FTIR of (a) Chitosan (b) C-NMIC

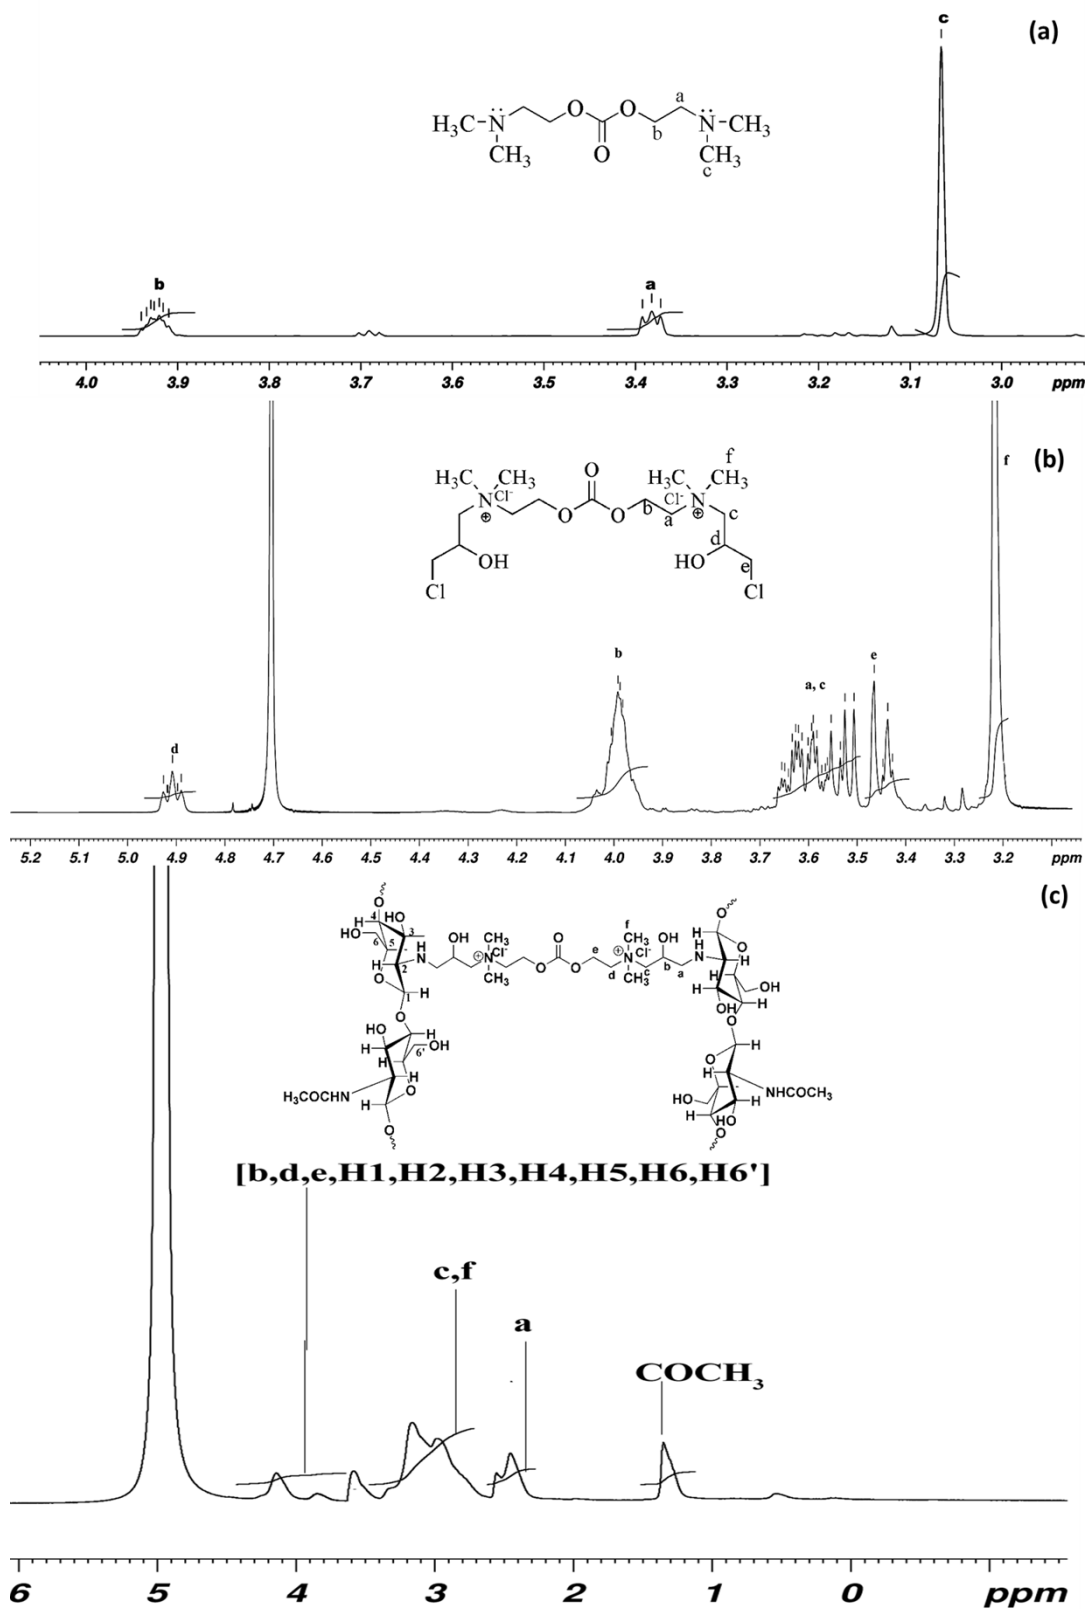

Fig. S3†  $^1\text{H-NMR}$  spectra of (a) DAEC, (b) NMIC and (c) C-NMIC

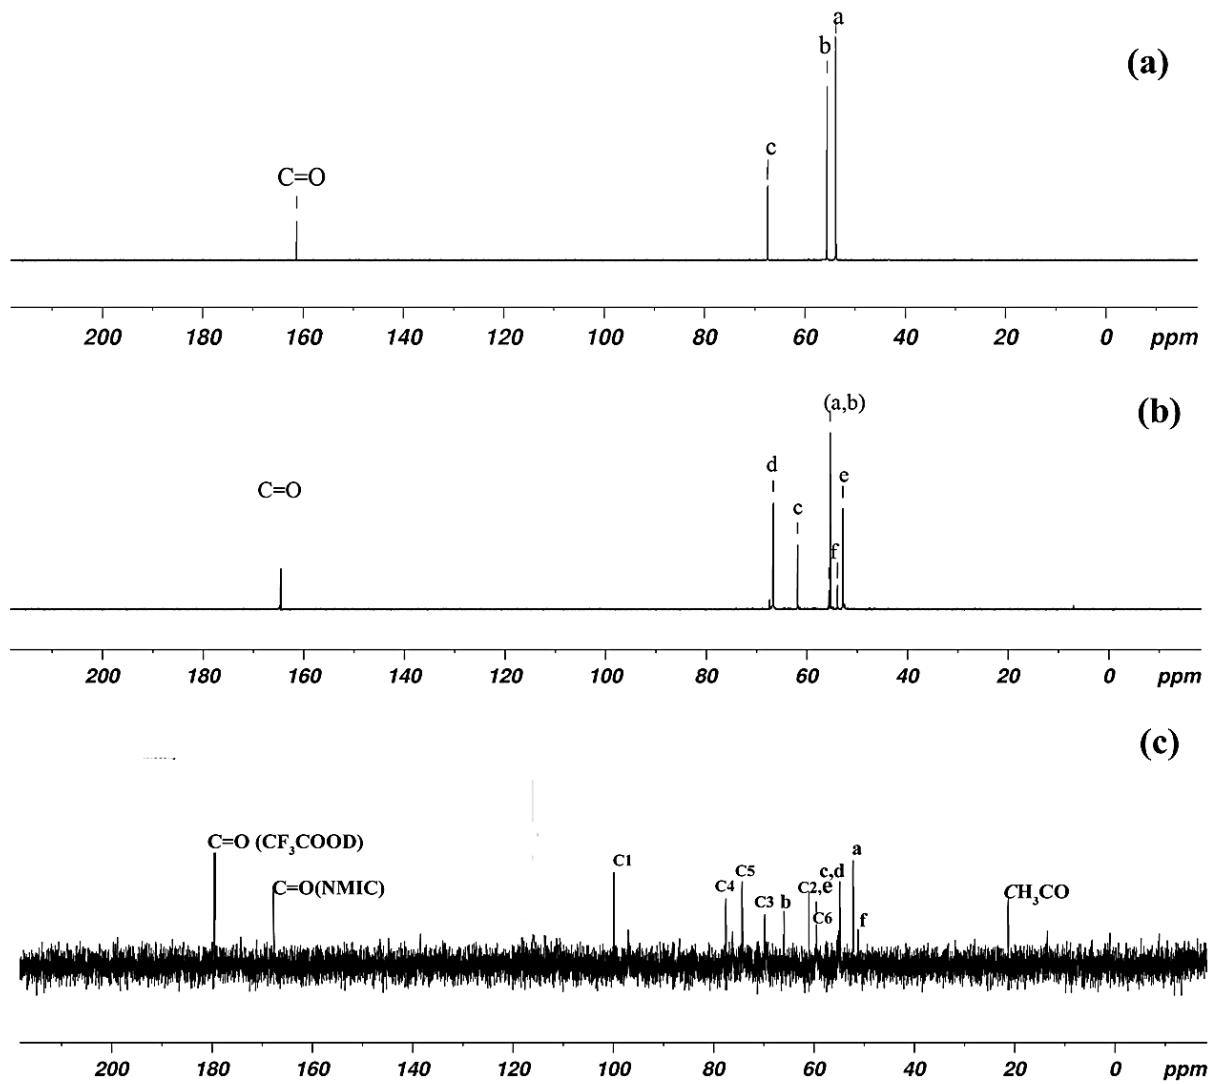

Fig. S4†  $^{13}\text{C}$  NMR of (a) DAEC (b) NMIC (c) C-NMIC

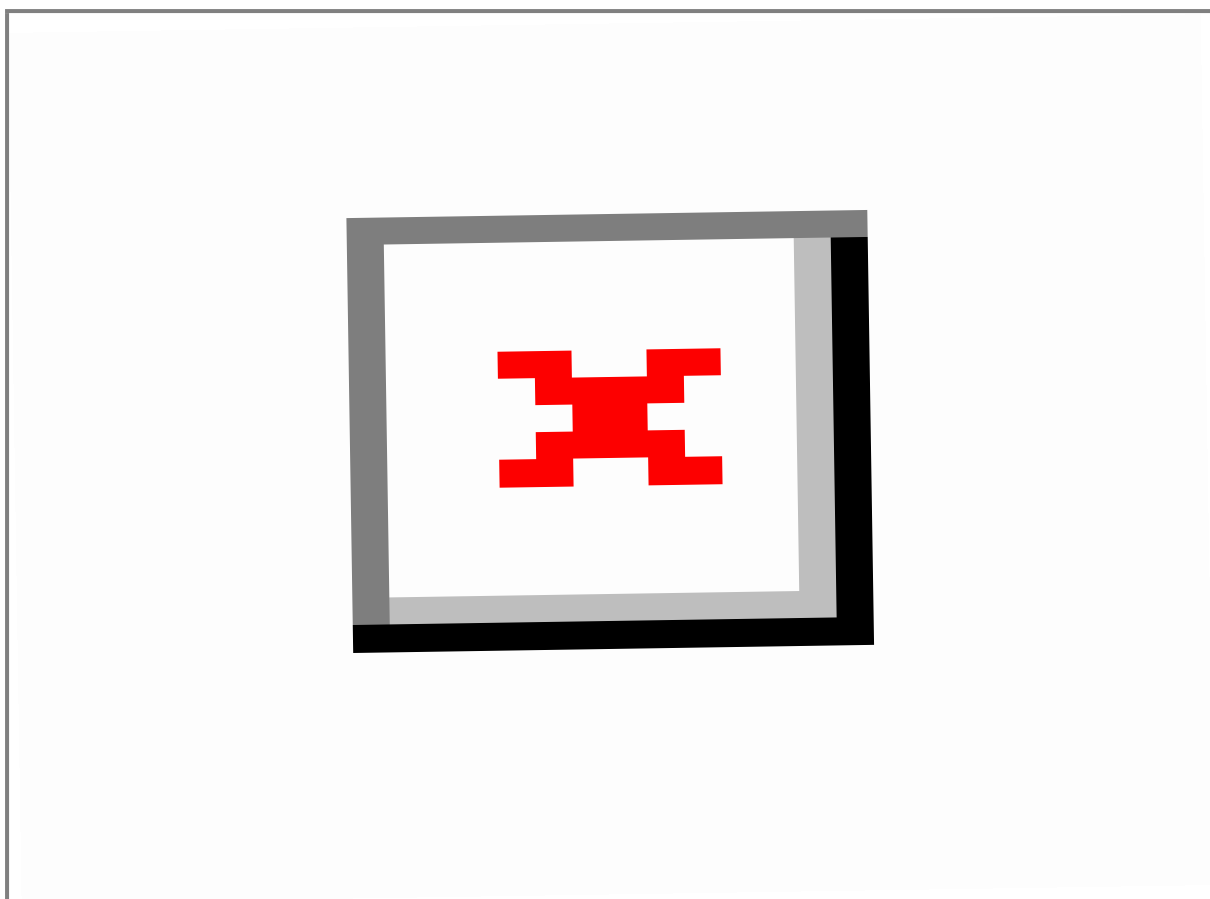

**Fig. S5†** Mass spectra of (a) DAEC (b) NMIC

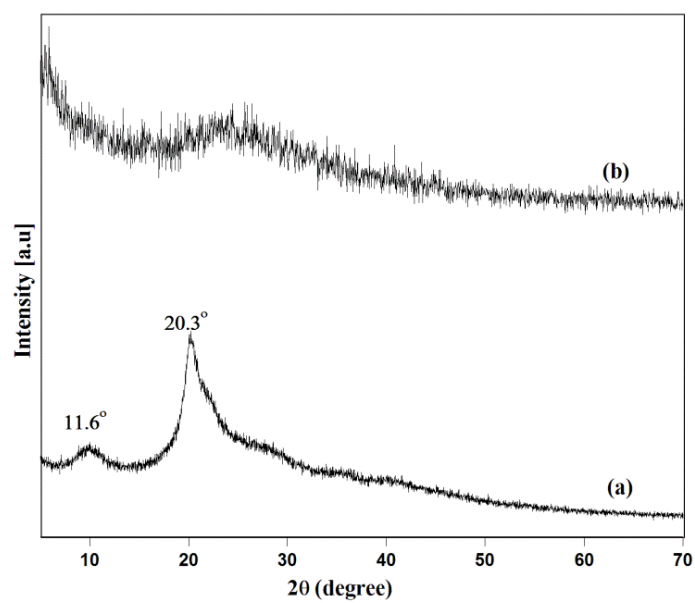

**Fig. S6†** XRD profiles of (a) Chitosan and (b) C-NMIC-NPs

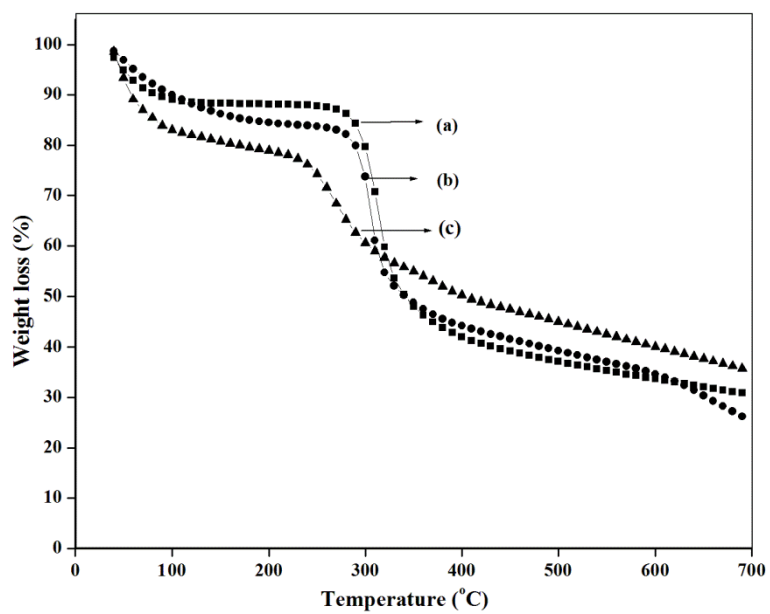

**Fig. S7†** TGA curves of (a) Chitosan, (b) C-NMIC and (c) C-NMIC-NPs

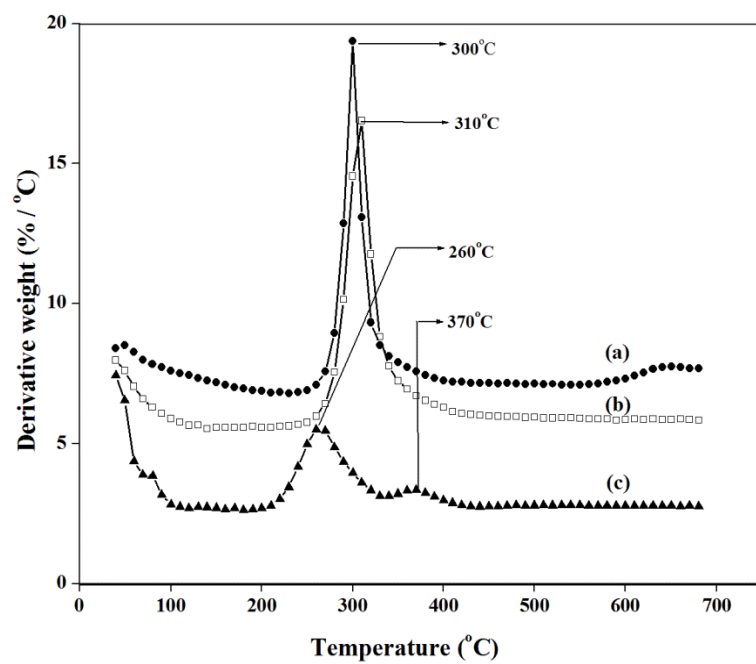

**Fig. S8†** DTG curves of (a) Chitosan (b) C-NMIC and (c) C-NMIC-NPs

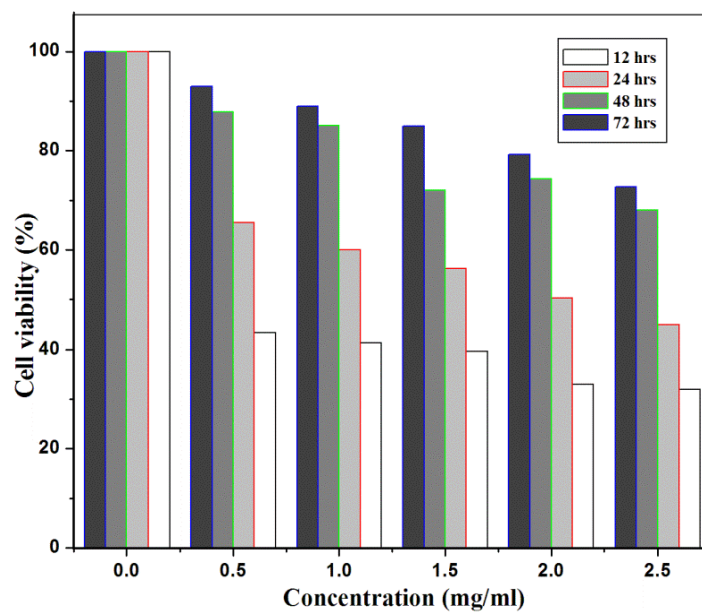

**Fig. S9†** Cell viability test performed on vero cell lines after cultivating with different Concentrations of C-NMIC-NPs

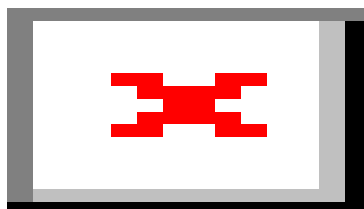

**Fig. S10†** MTT assay of (a) Control and (b) C-NMIC-Nps
